# Supplementary material for: Strongly Active Responses of Pinus tabuliformis Carr. and Sophora viciifolia Hance to CO2 Enrichment and Drought Revealed by Tree-Ring Isotopes on the Central China Loess Plateau
Source: MDPI journal article supplement (doi:10.3390/f13070986), 2022-06-23
Supplement: s1 [file s1]

Archive with 1 entries (1 files):
- forests-1719443-supplementary.pdf
