# Supplementary material for: Strongly Active Responses of Pinus tabuliformis Carr. and Sophora viciifolia Hance to CO2 Enrichment and Drought Revealed by Tree-Ring Isotopes on the Central China Loess Plateau
Source: MDPI journal article supplement (doi:10.3390/f13070986), 2022-06-23
Supplement: s1 [file s1 › forests-1719443-supplementary.pdf]

## Supplementary Materials

**Table S1.** Change rates of the  $\delta^{13}\text{C}_{\text{cor}}$ ,  $\delta^{18}\text{O}$  and intrinsic water-use efficiency ( $i\text{WUE}$ ) series in the drought strengthened period ( $D_{\text{s+}}$ , 1986–1999) or in the drought weakened period ( $D_{\text{s-}}$ , 2000–2017) calculated using simple piecewise regression based on the data of *Pinus tabuliformis* and *Sophora viciifolia*.

|                        | Period          | $\delta^{13}\text{C}_{\text{cor}}$ (‰ yr <sup>-1</sup> ) | $\delta^{18}\text{O}$ (‰ yr <sup>-1</sup> ) | $i\text{WUE}$ (μmol mol <sup>-1</sup> yr <sup>-1</sup> ) |
|------------------------|-----------------|----------------------------------------------------------|---------------------------------------------|----------------------------------------------------------|
| <i>P. tabuliformis</i> | $D_{\text{s+}}$ | 0.373***                                                 | -0.002                                      | 4.57***                                                  |
|                        | $D_{\text{s-}}$ | -0.064                                                   | -0.042                                      | 0.47                                                     |
| <i>S. viciifolia</i>   | $D_{\text{s+}}$ | 0.367                                                    | 0.460                                       | 4.64                                                     |
|                        | $D_{\text{s-}}$ | 0.004                                                    | -0.117*                                     | 1.28***                                                  |

Significance levels are presented by \* and \*\*\*: \* $p < 0.05$ ; \*\*\* $p < 0.005$ .

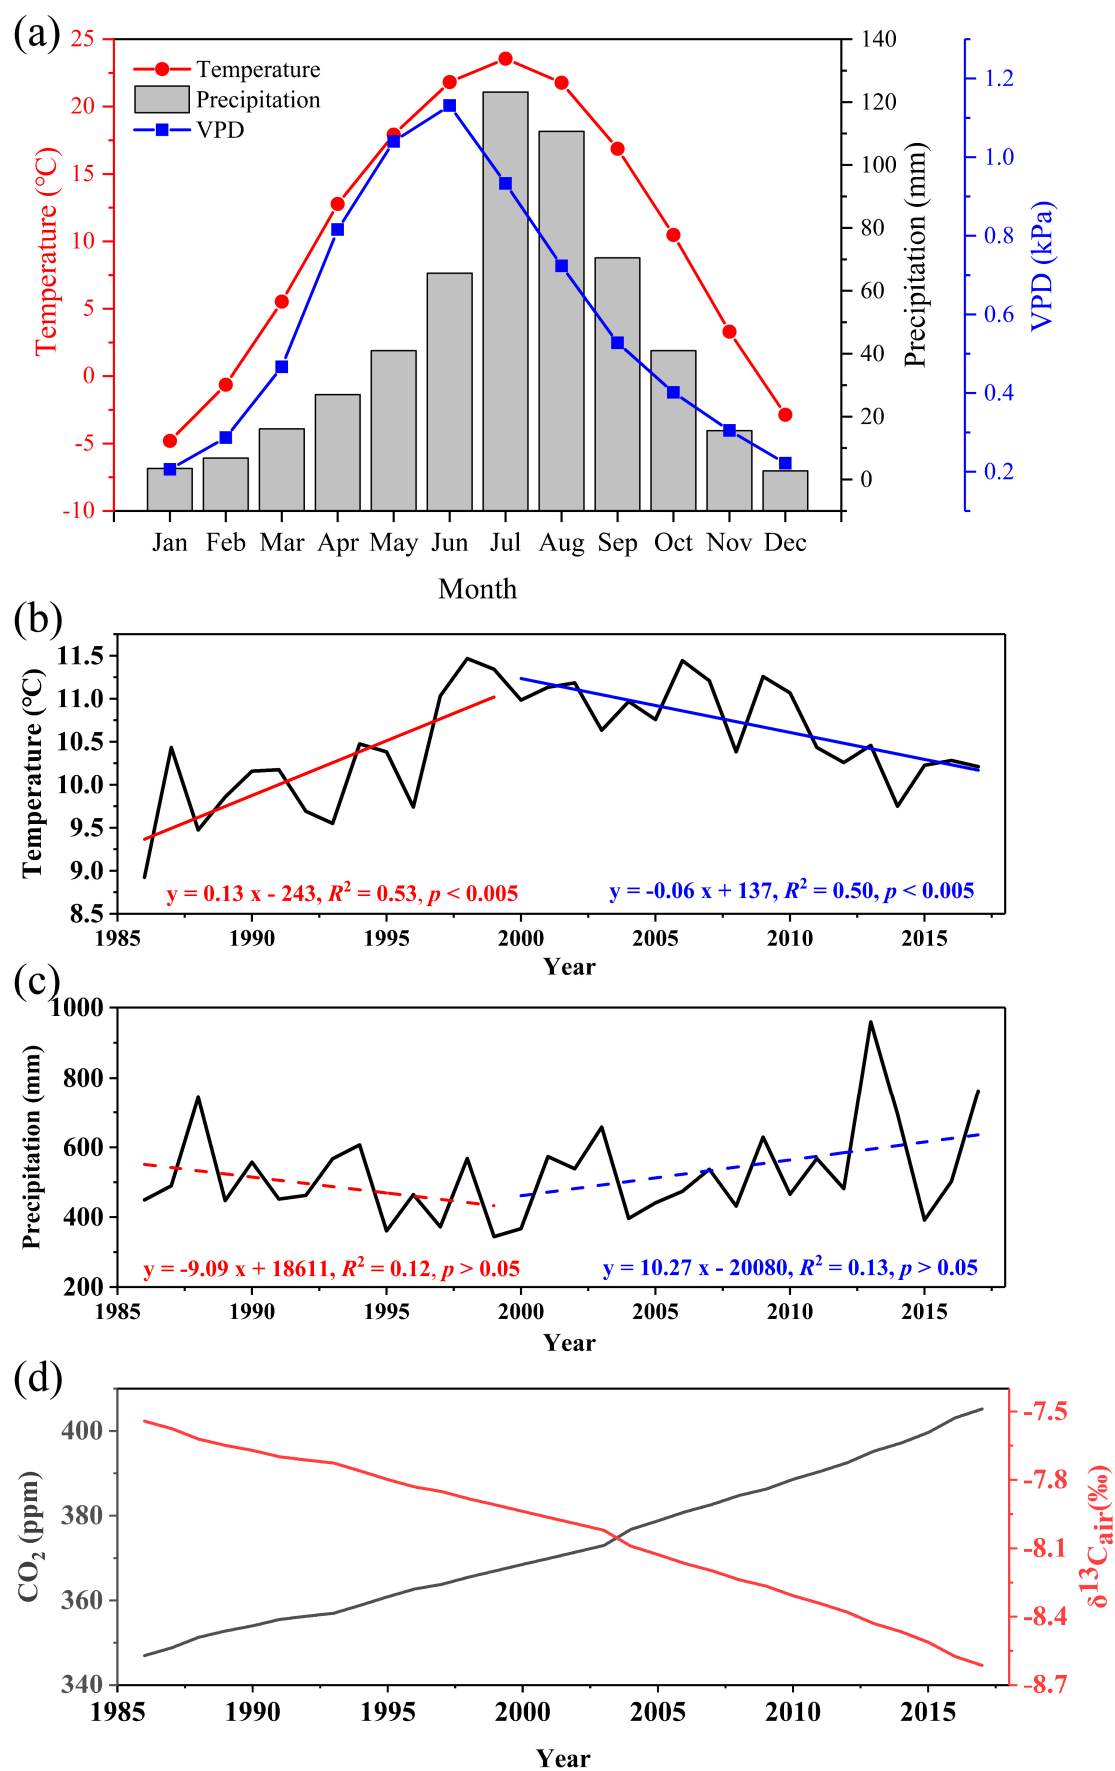

**Figure S1.** (a) The monthly mean temperature, precipitation and vapor-

pressure deficit (*VPD*) at the Yan'an meteorological station. Temporal variations of the annual (b) mean annual temperature, (c) total precipitation and (d) atmospheric carbon dioxide concentration ( $\text{CO}_2$ , grey line) and atmospheric stable carbon isotope ratio ( $\delta^{13}\text{C}_{\text{air}}$ , red line) from 1986 to 2017. We divide the entire period into two sub-periods based on the change in drought trends that occurred in 2000. The trends and linear regression models for mean annual temperature and total precipitation in the two sub-periods are also provided. The solid and dashed lines represent significant and nonsignificant trends, respectively.

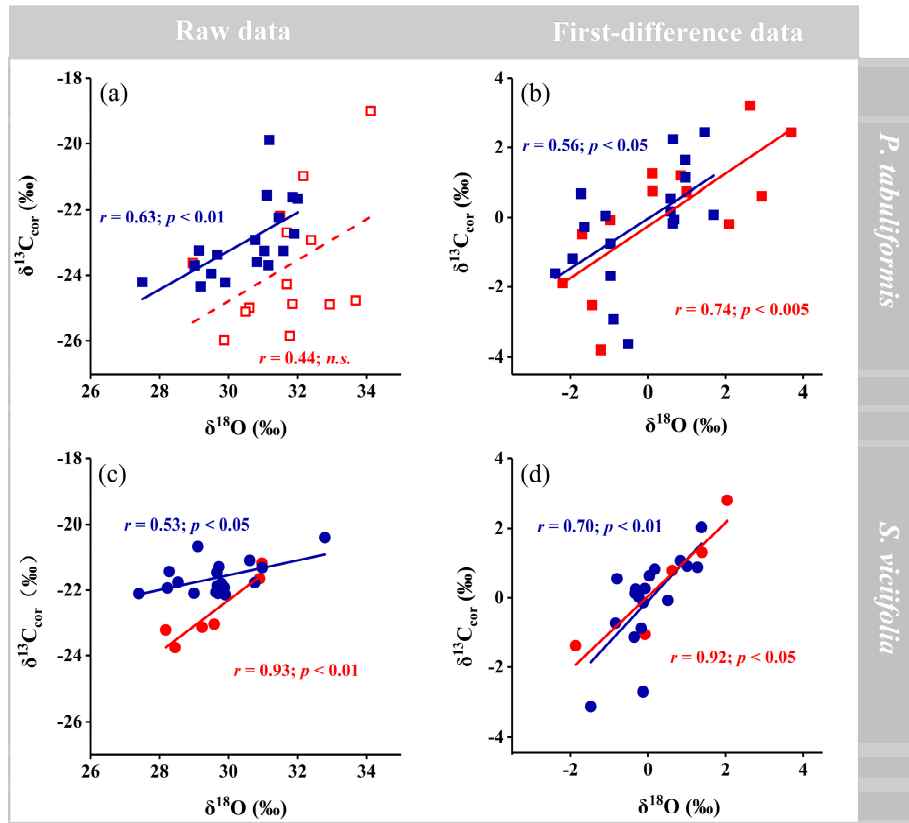

**Figure S2.** Scatter plots for the relationships between the tree-ring  $\delta^{13}\text{C}_{\text{cor}}$  and  $\delta^{18}\text{O}$  series during the period when drought stress strengthened (light red) and the period when drought stress weakened (dark blue) for (a, b) *Pinus tabulaeformis* and (c, d) *Sophora viciifolia*: (a, c) raw data, (b, d) the first-difference data. The Pearson correlation coefficients ( $r$ ) for the two subperiods is provided. The solid and dashed lines represent significant and nonsignificant trends, respectively. *n.s.*: non-significant ( $p > 0.05$ ).

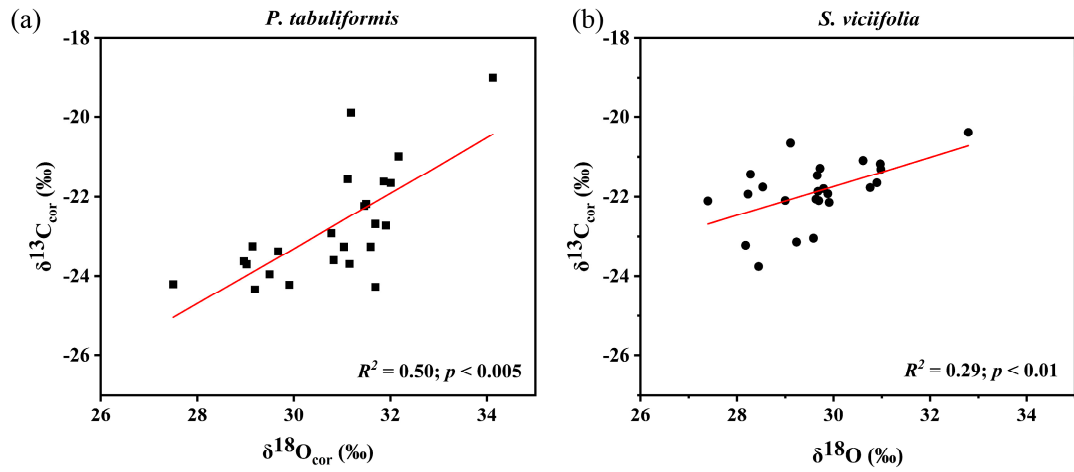

**Figure S3.** Scatter plots for the relationships between the tree-ring  $\delta^{13}\text{C}_{\text{cor}}$  and  $\delta^{18}\text{O}$  series during the common period from 1994 to 2017 for (a) *Pinus tabuliformis* and (b) *Sophora viciifolia* in the raw data. The coefficient of determination ( $R^2$ ) is provided.

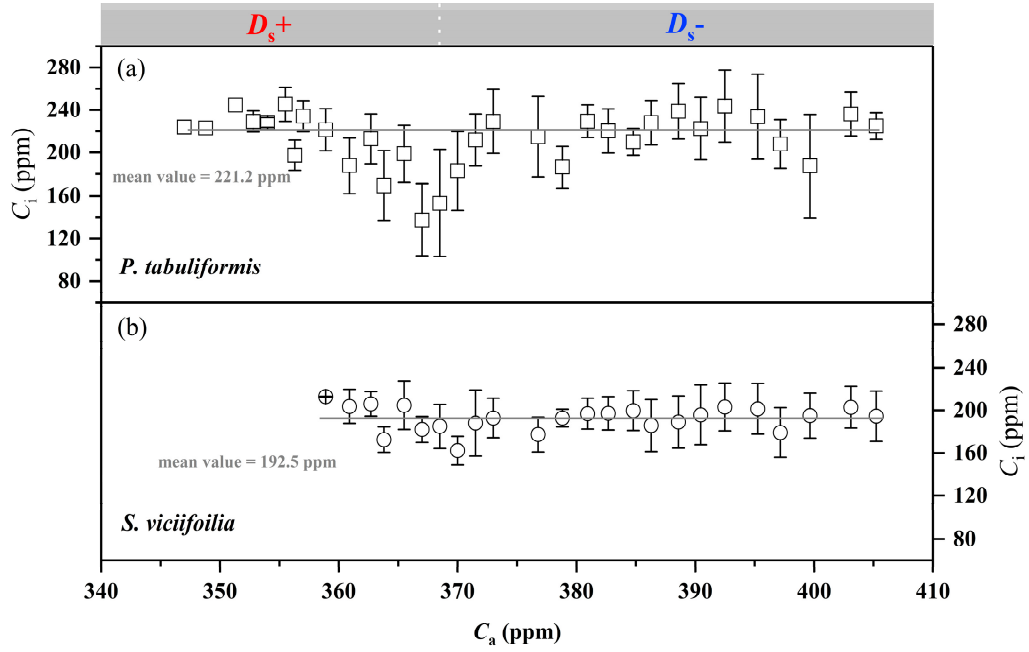

**Figure S4.** The trends of intercellular CO<sub>2</sub> concentration ( $C_i$ ) based on tree-ring  $\delta^{13}C_{\text{plant}}$  of *Pinus tabuliformis* (a) and *Sophora viciifolia* (b) as atmospheric CO<sub>2</sub> concentration ( $C_a$ ) rises. The grey straight lines indicate the mean value of intercellular CO<sub>2</sub> concentration ( $C_i$ ). Error bars are 1 standard deviation (SD).  $D_{s+}$  = the period when drought stress strengthened;  $D_{s-}$  = the period when drought stress weakened.
